# Supplementary material
Source: PubMed Central journal article supplement (PMC6910249)
Supplement: NIHMS1023111-supplement-Supp_info.pdf [file NIHMS1023111-supplement-Supp_info.pdf]

*Supporting Information*

# **Binary Targeting of siRNA to Hematologic Cancer Cells *In Vivo* using Layer-by-Layer Nanoparticles**

Ki Young Choi<sup>1,2,3</sup>, Santiago Correa<sup>1,4</sup>, Jouha Min<sup>1,2</sup>, Jiahe Li<sup>1,2</sup>, Sweta Roy<sup>1</sup>, Kristiana H Laccetti<sup>1</sup>, Erik Dreaden<sup>1,2</sup>, Stephanie Kong<sup>1,2</sup>, Roun Heo<sup>5</sup>, Young Hoon Roh<sup>1,2,6</sup>, Edward C Lawson<sup>7</sup>, Peter A Palmer<sup>7</sup>, and Paula T Hammond<sup>1,2</sup>

<sup>1</sup> Koch Institute for Integrative Cancer Research, Massachusetts Institute of Technology, Cambridge, MA, 02139, USA

<sup>2</sup> Department of Chemical Engineering, Massachusetts Institute of Technology, Cambridge, MA, 02139, USA

<sup>3</sup> Natural Product Informatics Research Center, Korea Institute of Science and Technology, Gangneung 25451, Republic of Korea.

<sup>4</sup> Materials Science and Engineering, Stanford University, Palo Alto, CA, 94305, USA

<sup>5</sup> Department of Health Sciences and Technology, SAIHST, Sungkyunkwan University, Suwon 440-746, Republic of Korea.

<sup>6</sup> Department of Biotechnology, Yonsei University, Seoul, 120-749, Republic of Korea.

<sup>7</sup> Janssen Research and Development, LLC, Spring House, PA, 19477, USA

Correspondence should be addressed to P.T.H. (hammond@mit.edu)

**Supporting Table S1. BCL-2 siRNA Cocktail Sequences**

| <b>BCL-2 siRNA cocktail (Target NCBI gene ID: 596)</b> |                           |
|--------------------------------------------------------|---------------------------|
| <b>Sense sequence</b>                                  | <b>Antisense sequence</b> |
| GAGGATTGTGGCCTTCTTT                                    | AAAGAAGGCCACAATCCTC       |
| GGGAGAACAGGGTACGATA                                    | TATCGTACCCTGTTCTCCC       |
| CCACCTGTGGTCCACCTGA                                    | TCAGGTGGACCACAGGTGG       |
| CCCTGTGGATGACTGAGTA                                    | TACTCAGTCATCCACAGGG       |
| GGCGCACGCTGGGAGAACA                                    | TGTTCTCCCAGCGTGCGCC       |
| GCCGCGACTTCGCCGAGAT                                    | ATCTCGGCGAAGTCGCGGC       |
| CTGCACCTGACGCCCTTCA                                    | TGAAGGGCGTCAGGTGCAG       |
| CGAGTGGGATGCGGGAGAT                                    | ATCTCCCGCATCCCCTCG        |
| GAGATAGTGATGAAGTACA                                    | TGTACTTCATCACTATCTC       |
| GGGTACGATAACCGGGAGA                                    | TCTCCCGGTTATCGTACCC       |
| CGGTGCCACCTGTGGTCCA                                    | TGGACCACAGGTGGCACC        |
| GTGATGAAGTACATCCATT                                    | AATGGATGTACTTCATCAC       |
| GGCCTTCTTTGAGTTCGGT                                    | ACCGAACTCAAAGAAGGCC       |
| GGGAGGATTGTGGCCTTCT                                    | AGAAGGCCACAATCCTCCC       |
| GGATGACTGAGTACCTGAA                                    | TTCAGGTACTIONCAGTCATCC    |
| GTACGATAACCGGGAGATA                                    | TATCTCCCGGTTATCGTAC       |
| CGCGACTTCGCCGAGATGT                                    | ACATCTCGGCGAAGTCGCG       |
| CCCGCACCGGGCATCTTCT                                    | AGAAGATGCCCGGTGCGGG       |
| GTGGACAACATCGCCCTGT                                    | ACAGGGCGATGTTGTCCAC       |
| CAGGCCGGCGACGACTTCT                                    | AGAAGTCGTCGCCGGCCTG       |
| GGGCCACAAGTGAAGTCAA                                    | TTGACTTCACTTGTGGCCC       |
| GGCTCGCTCAATCAAGAAA                                    | TTTCTTGATTGAGCGAGCC       |
| GCCTATACTATTTGTGA                                      | TCACAAATAGTGTATAGGC       |
| GCATACCTGGTGGGAGGAA                                    | TTCTCCCACCAGGTATGC        |
| GTGCTGCTATCCTGCCAAA                                    | TTTGGCAGGATAGCAGCAC       |
| GGGCCCTCCAGATAGCTCA                                    | TGAGCTATCTGGAGGGCCC       |
| GCATTGAAGTGAGGTGTCA                                    | TGACACCTCACTTCAATGC       |
| GGATGTTCTGTGCCTGTAA                                    | TTACAGGCACAGAACATCC       |
| GGATACTTTACATGGTTAA                                    | TTAACCATGTAAAGTATCC       |
| GAATTGGAGAGTGATAATA                                    | TATTATCACTCTCCAATTC       |
| GGGAACTATAAAGAAGTAA                                    | TTACTTCTTTATAGTTCCC       |
| CATGAGATTCATTCAGTTA                                    | TAACCTGAATGAATCTCATG      |
| CCGCATTTAATTCATGGTA                                    | TACCATGAATTAATGCGG        |
| GGGCTGTGATATTAACAGA                                    | TCTGTTAATATCACAGCCC       |
| GCCCAGACAAATGTGGTTA                                    | TAACCACATTTGTCTGGGC       |
| GAGTGAACAGAATTGCAA                                     | TTTGCAATTCTGTTCACTC       |
| GAAGGACAGCGATGGGAAA                                    | TTTCCCATCGCTGTCCTTC       |
| CTGTGGCATTATTGCATTA                                    | TAATGCAATAATGCCACAG       |
| GGCTCTGTCTGAGTAAGAA                                    | TTCTTACTCAGACAGAGCC       |
| CCATCGGGTCTGCTCCGAA                                    | TTCGGAGACGACCCGATGG       |

**Supporting Table S2. GAPDH siRNA Cocktail Sequences**

| <b>GAPDH siRNA cocktail (Target NCBI gene ID: 2597)</b> |                           |
|---------------------------------------------------------|---------------------------|
| <b>Sense sequence</b>                                   | <b>Antisense sequence</b> |
| GATGCCCCCATGTTTCGTCA                                    | TGACGAACATGGGGGCATC       |
| GCGATGCTGGCGCTGAGTA                                     | TACTCAGCGCCAGCATCGC       |
| GACAACAGCCTCAAGATCA                                     | TGATCTTGAGGCTGTTGTC       |
| CCTGCCAAATATGATGACA                                     | TGTCATCATATTTGGCAGG       |
| GGGGCTCTCCAGAACATCA                                     | TGATGTTCTGGAGAGCCCC       |
| CCCCACTGCCAACGTGTCA                                     | TGACACGTTGGCAGTGGGG       |
| CCACCCAGAAGACTGTGGA                                     | TCCACAGTCTTCTGGGTGG       |
| GGAGCCAAAAGGGTCATCA                                     | TGATGACCCTTTTGGCTCC       |
| GGAGTCCCTGCCACACTCA                                     | TGAGTGTGGCAGGGACTCC       |
| CAGCAAGAGCACAAGAGGA                                     | TCCTCTTGTGCTCTTGCTG       |
| GCACCGTCAAGGCTGAGAA                                     | TTCTCAGCCTTGACGGTGC       |
| CAACTTTGGTATCGTGGAA                                     | TTCCACGATAACAAAGTTG       |
| GAATTTGGCTACAGCAACA                                     | TGTTGCTGTAGCCAAATTC       |
| GCATTGCCCTCAACGACCA                                     | TGGTCGTTGAGGGCAATGC       |
| GAAGCTTGTCAATGGA                                        | TCCATTGATGACAAGCTTC       |
| CATGGCCTCCAAGGAGTAA                                     | TACTCCTTGGAGGCCATG        |
| CTCAACGACCACTTTGTCA                                     | TGACAAAGTGGTCGTTGAG       |
| CTGCACCACCAACTGCTTA                                     | TAAGCAGTTGGTGGTGCAG       |
| CCCCTCCTCCACCTTTGA                                      | TCAAAGGTGGAGGAGTGGG       |
| GTGGTCTCCTCTGACTTCA                                     | TGAAGTCAGAGGAGACCAC       |
| CATGTAGACCCCTTGAAGA                                     | TCTTCAAGGGGTCTACATG       |
| CTCACAGTTGCCATGTAGA                                     | TCTACATGGCAACTGTGAG       |
| CATGAGAAGTATGACAACA                                     | TGTTGTCATACTTCTCATG       |
| CTCATTTCTGGTATGACA                                      | TGTCATACCAGGAAATGAG       |
| CGCACCTTGTCAATGACCA                                     | TGGTACATGACAAGGTGCG       |
| GTGTGAACCATGAGAAGTA                                     | TACTTCTCATGGTTCACAC       |
| CTGACCTGCCGTCTAGAAA                                     | TTTCTAGACGGCAGGTGAG       |
| CCACCCATGGCAAATTCCA                                     | TGGAATTTGCCATGGGTGG       |
| CGAGATCCCTCCAAAATCA                                     | TGATTTTGGAGGGATCTCG       |
| GTCATGTACCATCAATAAA                                     | TTTATTGATGGTACATGAC       |
| GATGCCCCCATGTTTCGTCA                                    | TGACGAACATGGGGGCATC       |
| GCGATGCTGGCGCTGAGTA                                     | TACTCAGCGCCAGCATCGC       |
| GACAACAGCCTCAAGATCA                                     | TGATCTTGAGGCTGTTGTC       |
| CCTGCCAAATATGATGACA                                     | TGTCATCATATTTGGCAGG       |

**Supporting Table S3. Negative Control siRNA Cocktail Sequences**

| <b>Negative control siRNA cocktail</b> |                           |
|----------------------------------------|---------------------------|
| <b>Sense sequence</b>                  | <b>Antisense sequence</b> |
| TGTACGCGTCTCGCGATTT                    | AAATCGCGAGACGCGTACA       |
| TATACGCGGTACGATCGTT                    | AACGATCGTACCGCGTATA       |
| TTCGCGTAATAGCGATCGT                    | ACGATCGCTATTACGCGAA       |
| TCGGCGTAGTTTCGACGAT                    | ATCGTCGAAACTACGCCGA       |
| TCGCGTAAGGTTTCGCGTAT                   | ATACGCGAACCTTACGCGA       |
| TCGCGATTTTAGCGCGTAT                    | ATACGCGCTAAAATCGCGA       |
| TCGCGTATATACGCTACGT                    | ACGTAGCGTATATACGCGA       |
| TTTCGCGAACGCGCGTAAT                    | ATTACGCGCGTTTCGCGAAA      |
| TCGTATCGTATCGTACCGT                    | ACGGTACGATACGATACGA       |
| TTATCGCGCGTTATCGCGT                    | ACGCGATAACGCGCGATAA       |
| TCTCGTAGGTACGCGATCT                    | AGATCGCGTACCTACGAGA       |
| TCGTACTIONGATAGCGCAAT                  | ATTGCGCTATCGAGTACGA       |
| TTTGCGATACCGTAACGCT                    | AGCGTTACGGTATCGCAA        |
| TGCGTAAGGCATGTCGTAT                    | ATACGACATGCCTTACGCA       |
| TTATCGGCAGTTCGCCGTT                    | AACGGCGAACTGCCGATAA       |
| TAGCGCGACATCTATCGCT                    | AGCGATAGATGTCGCGCTA       |
| TCGTTCGTATCAGCGCGTTT                   | AAACGCGCTGATACGACGA       |
| TACGCGAAACTGCGTTCGT                    | ACGAACGCAGTTTCGCGTA       |
| TCGACGATAGCTATCGCGT                    | ACGCGATAGCTATCGTCGA       |
| TCGCGTAATACGCGATCGT                    | ACGATCGCGTATTACGCGA       |
| TCGCGATAATGTTACGCGT                    | ACGCGTAACATTATCGCGA       |
| TTAACGCGCTACGCGTATT                    | AATACGCGTAGCGCGTTAA       |
| TCGCGTATAGGTAACGCGT                    | ACGCGTTACCTATACGCGA       |
| TTACGCGATCACGTAACGT                    | ACGTTACGTGATCGCGTAA       |
| TTATCGCGCGTTCGCGTAAT                   | ATTACGCGACGCGCGATAA       |
| TTACGTACTIONGACTGCGTACT                | AGTACGCACTAGTACGTAA       |
| TATACGCCGGTTGCGTAGT                    | ACTACGCAACCGGCGTATA       |
| TTCGCGTGCATAGCGTAAT                    | ATTACGCTATGCACGCGAA       |
| TACGCGACCTAATCGCGAT                    | ATCGCGATTAGGTCGCGTA       |
| TCGTACGCTGAACGCGTAT                    | ATACGCGTTCAGCGTACGA       |

**Supporting Table S4. BCL-2 Target Single siRNA Sequences**

| <b>BCL-2 siRNA1</b>    |                           |
|------------------------|---------------------------|
| <b>Sense sequence</b>  | <b>Antisense sequence</b> |
| UUUCCUGCAUCUCAUGCCA    | UGGCAUGAGAUGCAGGAAA       |
| <b>BCL-2 siRNA2</b>    |                           |
| <b>Sense sequence</b>  | <b>Antisense sequence</b> |
| CAGGACCUCGCCGUCGACAGAC | CGGUCCUGGAGCGGCGACGUCUG   |

**Supporting Table S5. Off-Target Effects of BCL-2 target siRNAs**

| Sample   | Off target gene | Tscan score | Expression (%) | SD     |
|----------|-----------------|-------------|----------------|--------|
| siRNA1   | PHF10           | -0.938      | 76.096         | 5.116  |
|          | MRPL48          | -0.778      | 90.685         | 11.302 |
|          | EFNA4           | -0.775      | 91.833         | 4.768  |
|          | VAMP5           | -0.734      | 121.455        | 16.646 |
|          | CCNB1IP1        | -0.71       | 102.412        | 25.332 |
|          | SSFA2           | -0.7        | 60.769         | 3.354  |
|          | NUPL2           | -0.686      | 79             | 17.706 |
|          | OSMR            | -0.667      | 111.556        | 10.116 |
|          | MTA3            | -0.652      | 98.297         | 12.366 |
|          | SDHD            | -0.643      | 49.375         | 6.272  |
| siRNA2   | HIST1H2BK       | -0.709      | 29.365         | 2.354  |
|          | ZG16B           | -0.703      | 88.738         | 9.883  |
|          | TTC32           | -0.695      | 88.38          | 4.806  |
|          | NDUFA11         | -0.664      | 22.944         | 1.668  |
|          | ATPIF1          | -0.656      | 76.237         | 12.684 |
| Cocktail | NDUFB2          | -1.038      | 118.133        | 18.361 |
|          | SMIM20          | -1.036      | 135.965        | 15.403 |
|          | SRP9            | -1.026      | 74.652         | 16.239 |
|          | NDUFB5          | -1.003      | 94.021         | 46.2   |
|          | CCNO            | -0.971      | 84.435         | 12.57  |
|          | PPCS            | -0.95       | 96.67          | 19.007 |
|          | NUDT3           | -0.927      | 71.402         | 9.069  |

**TargetScan Score.** TargetScan gives scores ranging from -2 to 0 to indicate the off-target risk for individual genes. -2 is the strongest indication, which however still only gives a 40% accuracy (i.e. more than 50% of the predictions could be wrong). For scores of -1, the accuracy drops below 10% (i.e. >90% of the off-target predictions could be wrong).

## Lysine modification

### □ Step 1: Polyelectrolyte modification

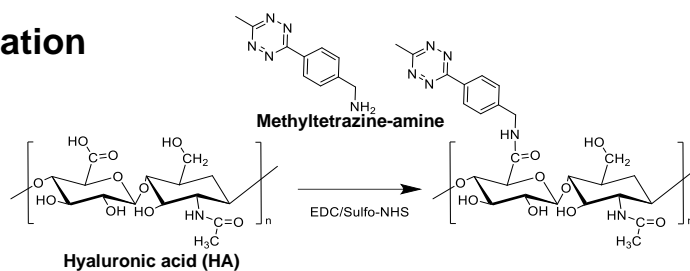

### □ Step 2: Anti-CD20 antibody modification

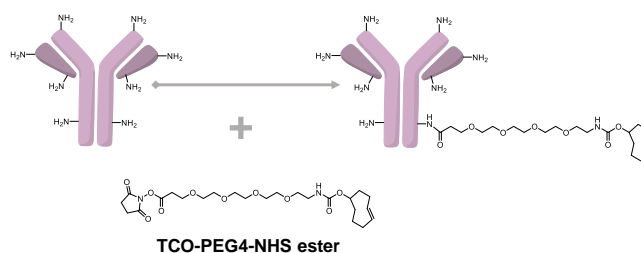

### □ Step 3: NP modification

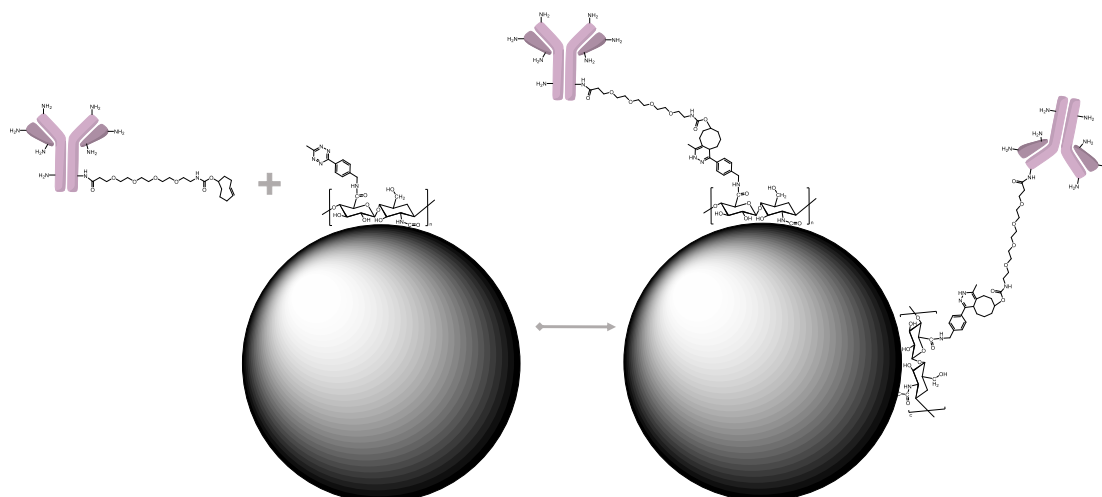

**Supporting Information Scheme S1.** Schematic illustration of lysine modification steps for preparation of LbLTCO-modified anti-CD20 antibody.

## Sulfhydryl modification

### □ Step 1: Polyelectrolyte modification

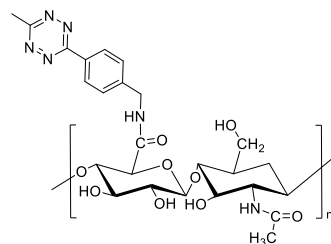

### □ Step 2: Ab modification

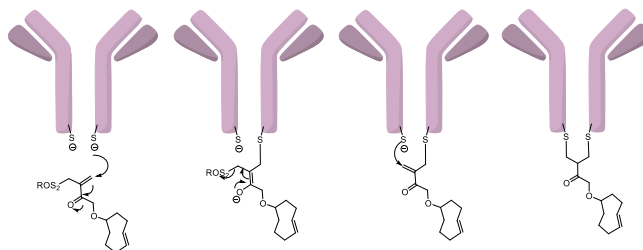

### □ Step 3: NP modification

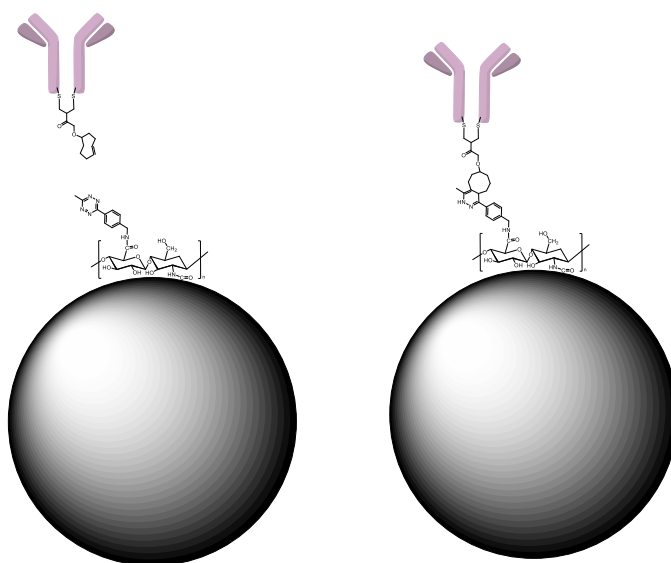

**Supporting Information Scheme S2.** Schematic illustration of sulfhydryl modification steps for preparation of TCO-modified anti-CD20 antibody.

**A**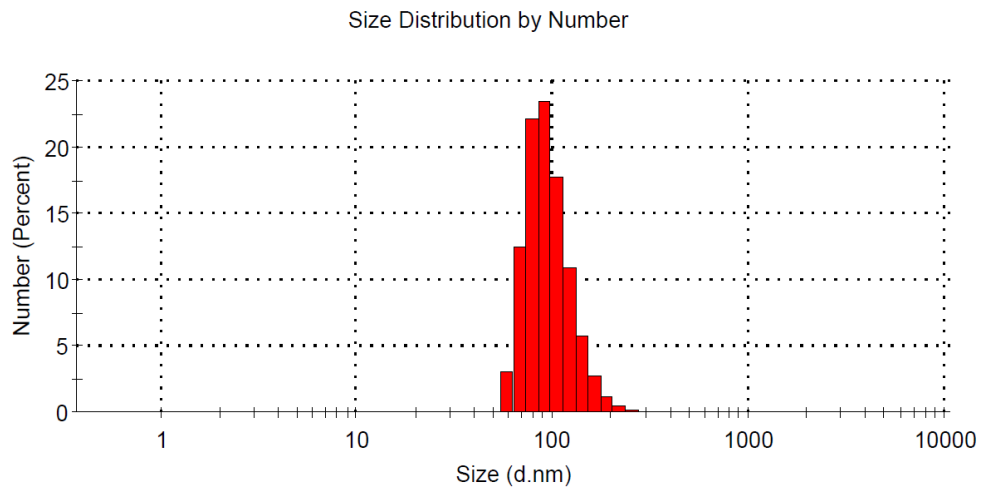**B**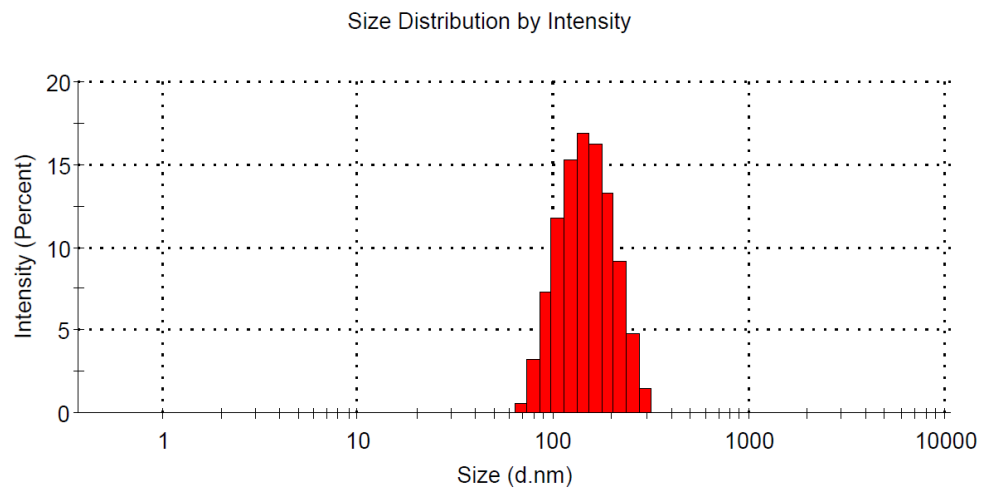

**Supporting Figure S1.** Size distribution of CD20/44-siNC-LbL-NPs calculated by **(A)** number and **(B)** intensity.



**Supporting Table S6. Characterization of HA-TET, CD20-TCO and CD20-LbL-NPs**

| Sample                | TET / HA <sup>a</sup> | TCO / Ab <sup>b</sup> | Ab / NP <sup>c</sup><br>( $\mu\text{g}$ / mg) | siRNA / NP <sup>d</sup><br>( $\mu\text{g}$ / mg) | Efficiency <sup>e</sup><br>(%) |
|-----------------------|-----------------------|-----------------------|-----------------------------------------------|--------------------------------------------------|--------------------------------|
| HA-TET                | 16.1                  |                       |                                               |                                                  | 51.0                           |
| CD20-TCO-NHS          |                       | 5.2                   |                                               |                                                  | 26.0                           |
| CD20-TCO-Thio         |                       | 4.1                   |                                               |                                                  | 20.5                           |
| CD20-TCO-NHS- LbL-NP  |                       |                       | 0.41                                          |                                                  | 16.2                           |
| CD20-TCO-Thio- LbL-NP |                       |                       | 0.37                                          |                                                  | 14.5                           |
| siRNA-LbL-NP          |                       |                       |                                               | 124.0                                            | 4.1                            |

<sup>a</sup> Number of methyltetrazine molecules conjugated to a hyaluronic acid, measured by a UV spectrometer.

<sup>b</sup> Number of TCO molecules conjugated to a CD20 antibody. TCO conjugation was quantified by a fluorescence spectrometer after Cy3-tetrazine molecules were conjugated to the TCO molecules on CD20-Ab.

<sup>c</sup> CD20 antibody ( $\mu\text{g}$ ) per 1 mg of PLGA nanoparticles. The amount of CD20 was quantified by a fluorescence spectrometer using fluorescently labeled CD20 antibody

<sup>d</sup> siRNA ( $\mu\text{g}$ ) per 1 mg of PLGA nanoparticle core. The amount of siRNA was quantified using a using Quant-iT™ RiboGreen® RNA Assay Kit.

<sup>e</sup> Conjugation/loading efficiency. Weight percentage of amount of TET, TCO, CD20-Ab or siRNA relative to the initially feeding amount.

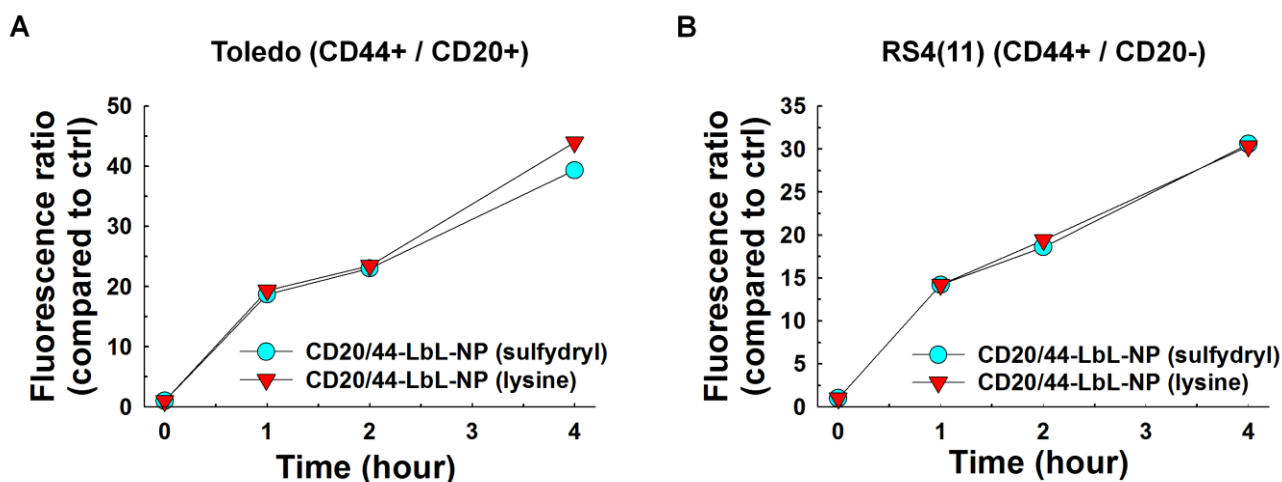

**Supporting Figure S2.** Relative fluorescence intensities of **(A)** Toledo and **(B)** RS4(11) cells treated with fluorescently labeled CD20/CD44 dual-targeted LbL-NPs prepared by lysine or sulfhydryl modification method.

**Targeting blood cancer cells.** The outer layer of hyaluronic acid-CD20 antibody conjugate was prepared via two different antibody conjugation methods—lysine modification and sulfhydryl modification—to figure out which approach led to more optimal conjugation (Supporting Scheme S1,2). FACS results indicated that sulfhydryl modified CD20/44-LbL-NPs showed 11.8% higher cellular uptake into Toledo cells at 4 h than lysine modified CD20/44-LbL-NPs, implying the sulfhydryl modification method affected the binding affinity of the anti-CD20 Ab less than lysine modification method. However, CD20/44-LbL-NPs (sulfhydryl) did not show significant increase in cellular uptake into the RS4(11) cells compared to CD20/44-LbL-NPs (lysine) indicating CD20-targeting is not the main cellular uptake mechanism for CD20-negative RS4(11) cells (Supporting Fig. S2).

**A****Toledo**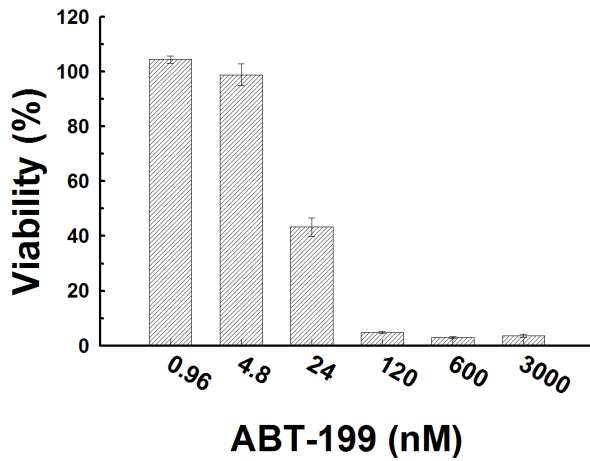**B****RS4(11)**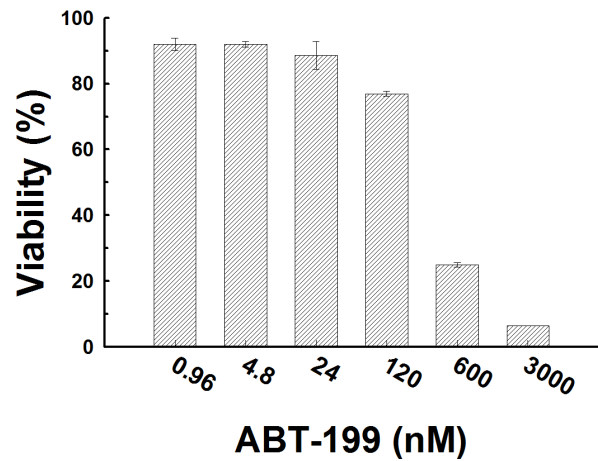

**Supporting Figure S3.** Cell viability of **(A)** RS4(11) and **(B,E)** Toledo cells after treatment with a small molecule BCL-2 inhibitor ABT-199.

**BCL-2 dependent cell viability.** To evaluate BCL-2 dependent cell viability of RS4(11) and Toledo cells, we treated the cells with a small molecule BCL-2 inhibitor, ABT-199 (Venclaxta™, Abbvie, Genentech). ABT-199 treatment decreased viability of RS4(11) and Toledo cells in a dose-dependent manner, implying that BCL-2 is a crucial protein that mediates between cell survival and death (Supporting Fig. S1).

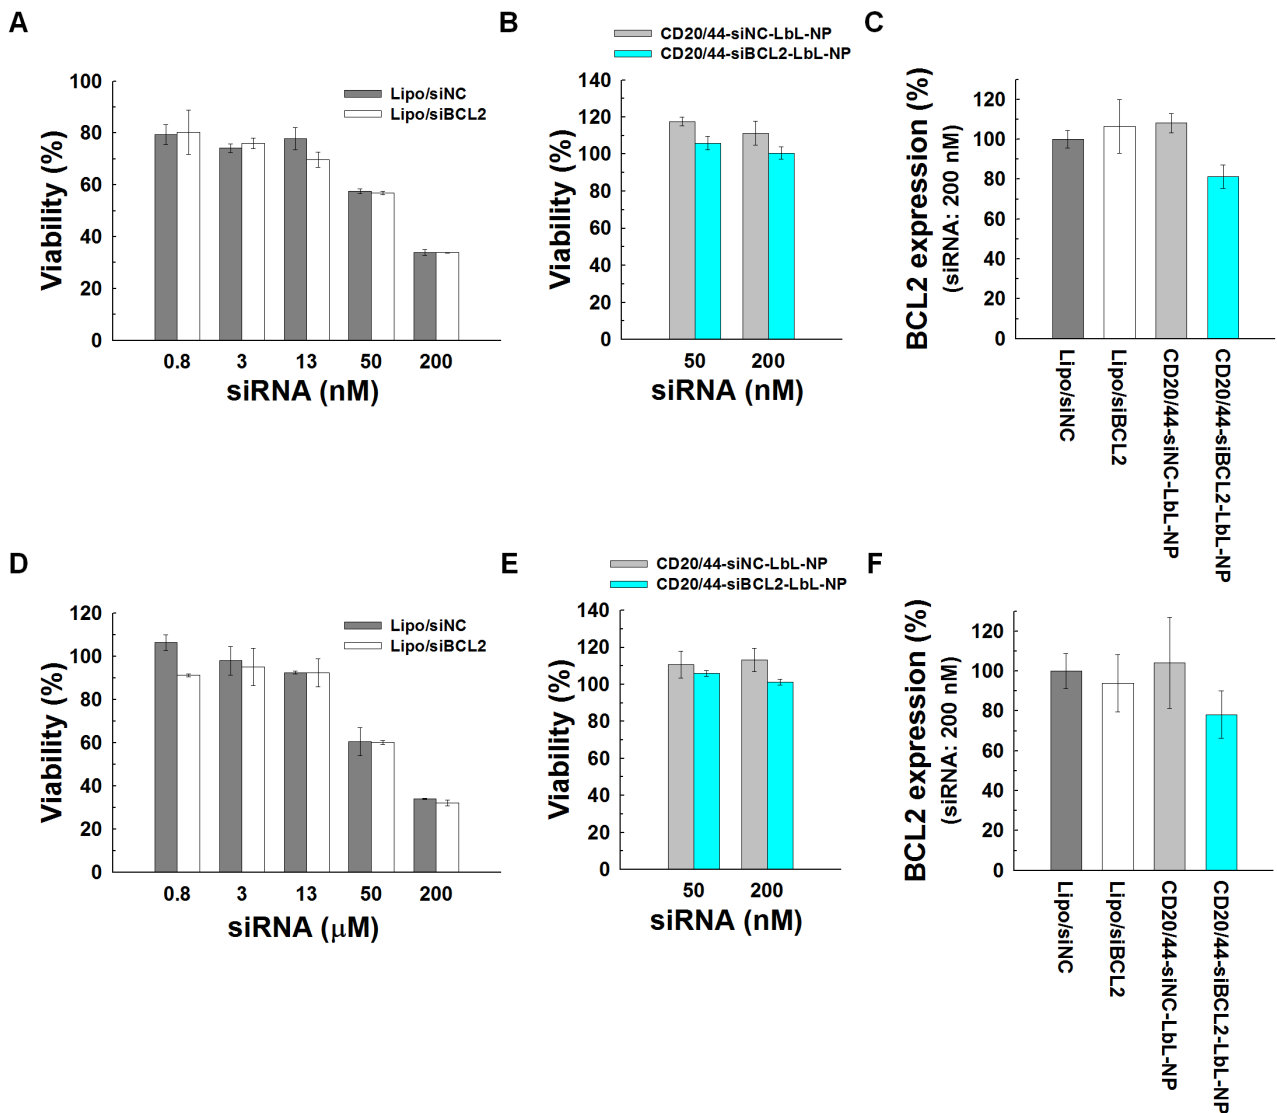

**Supporting Figure S4.** Cell viability of **(A,D)** RS4(11) and **(B,E)** Toledo cells after treatment with negative control siRNA cocktails (siNC) or BCL-2 target siRNA cocktails (siBCL2) formulated with Lipo or LbL-NPs (LNPs). BCL-2 expression on **(C)** RS4(11) or **(F)** Toledo cells after treatment with siNC or siBCL2.

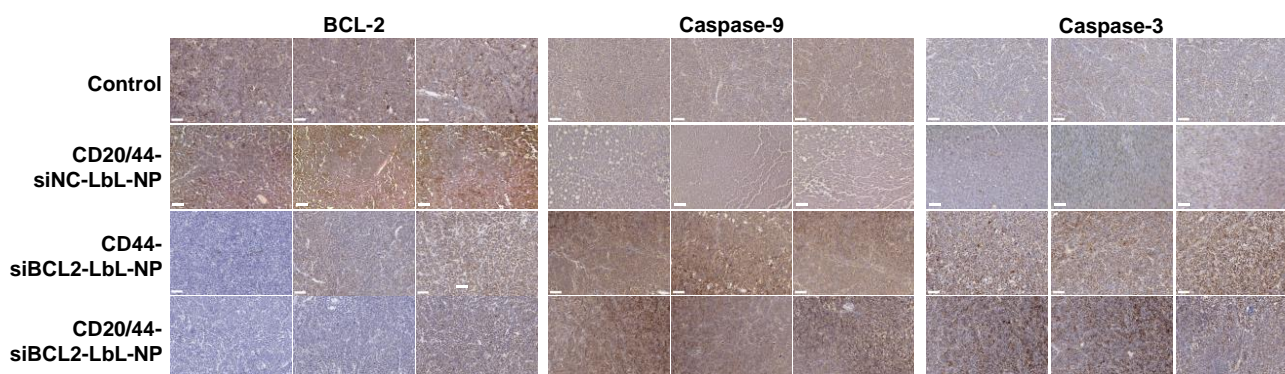

**Supporting Figure S5.** Immunohistochemistry images of tumor sections collected from SCID beige mice intravenously injected with Toledo cells and LbL-NPs (scale bar = 50  $\mu$ m).

First, we evaluated changes in BCL-2 protein levels by a western blot. We lysed the tumor tissues and assessed BCL-2 expression levels in the tumor lysate. Western blot results showed significantly lower BCL-2 expression levels in the tumor lysates of CD44-siBCL2-LbL-NP and CD20/44-siBCL2-LbL-NP groups than those of the control group (Fig. 7a,c).

**Supporting Table S7. Serum Levels of ALT, SAT, ALK and TP <sup>a</sup>**

| <b>Assay</b>                            | <b>Normal</b> | <b>Units</b> | <b>CD20/44-siBCL2-LbL-NP</b> | <b>CD44-siBCL2-LbL-NP</b> |
|-----------------------------------------|---------------|--------------|------------------------------|---------------------------|
| <b>Alanine Aminotransferase (ALT)</b>   | 17~77         | U/L          | 34 ± 0.71                    | 41 ± 3.5                  |
| <b>Aspartate Aminotransferase (AST)</b> | 54-298        | U/L          | 104 ± 12.7                   | 100 ± 24.0                |
| <b>Alkaline phosphatase (ALK)</b>       | 35-96         | U/L          | 64 ± 18                      | 51 ± 13                   |
| <b>Protein, Total (TP)</b>              | 3.5-7.2       | g/dL         | 6.2 ± 0.14                   | 5.7 ± 0.14                |

<sup>a</sup>Data are mean ± SD (n=2 per group).

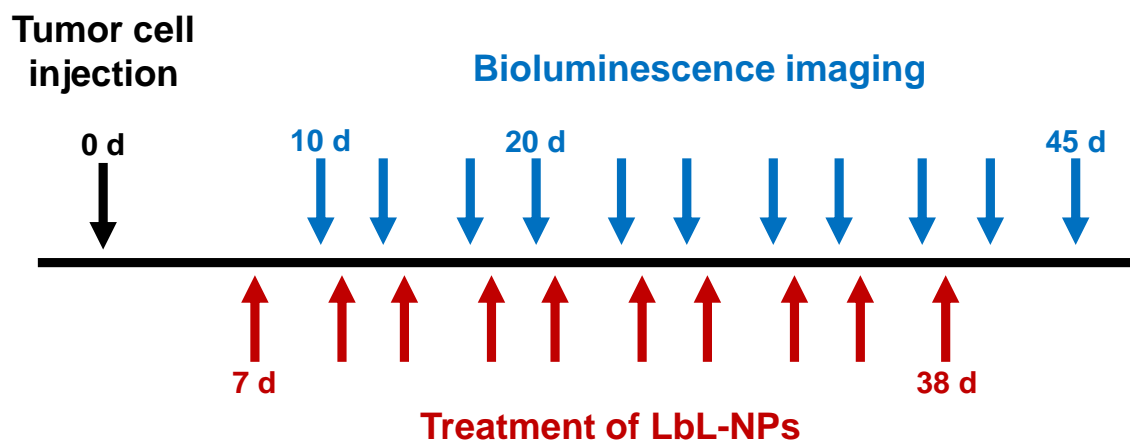

Supporting Figure S6. Diagram of the general procedure.
